# Supplementary material for: Fabrication of Nano/Micro-Structured Electrospun Detection Card for the Detection of Pesticide Residues
Source: MDPI journal article supplement (doi:10.3390/foods10040889), 2021-04-19
Supplement: s1 [file s1]

## Supplement Information

### **Fabrication of nano/micro-structured electrospun detection card for the detection of pesticide residues**

Kun Feng<sup>a</sup>, Meng-Yu Zhai<sup>a</sup>, Yun-Shan Wei<sup>a</sup>, Min-Hua Zong<sup>a</sup>, Hong Wu<sup>a\*</sup>, Shuang-Yan Han<sup>b\*</sup>

<sup>a</sup> School of Food Science and Engineering, Guangdong Province Key Laboratory for Green Processing of Natural Products and Product Safety, South China University of Technology  
Guangzhou 510640, China

<sup>b</sup> College of Biosciences and Bioengineering, South China University of Technology  
Guangzhou 510640, China

\*Corresponding authors. E-mail addresses: bbhwu@scut.edu.cn (H. Wu), syhan@scut.edu.cn (S.-Y. Han).

**Table S1** Effect of PCL concentration and volume ratio of CHCl<sub>3</sub> to CH<sub>3</sub>OH on the properties of electrospinning solution (**n=3**).

| PCL (g/L) | CH <sub>3</sub> OH:CHCl <sub>3</sub> | Viscosity (mPa·s) | Conductivity (μs/cm) |
|-----------|--------------------------------------|-------------------|----------------------|
| 100       | 3:7                                  | 23.1±0.2          | 1.163±0.006          |
| 125       | 3:7                                  | 45.4±0.3          | 1.302±0.014          |
| 150       | 3:7                                  | 84.5±0.2          | 1.417±0.007          |
| 125       | 0                                    | 28.2±0.4          | 0.002±0              |
| 125       | 1:9                                  | 35.9±0.4          | 0.178±0.004          |
| 125       | 3:7                                  | 45.4±0.1          | 1.417±0.011          |
| 125       | 5:5                                  | 59.9±0.3          | 1.734±0.007          |

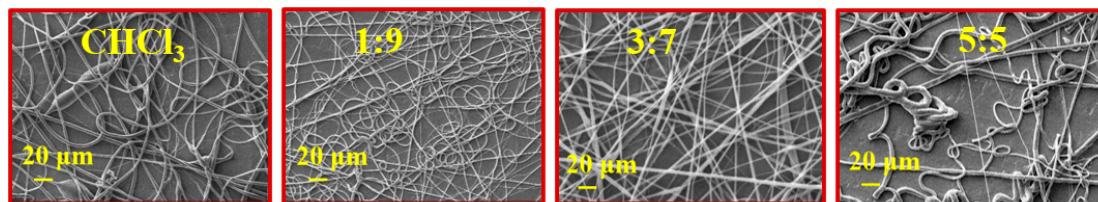

**Figure S1.** SEM images of electrospun fibers at different ratios of CH<sub>3</sub>OH to CHCl<sub>3</sub> (the electrospinning conditions were: voltage of 13 kV, flow rate of 2.5 mL/h and distance of 13 cm).

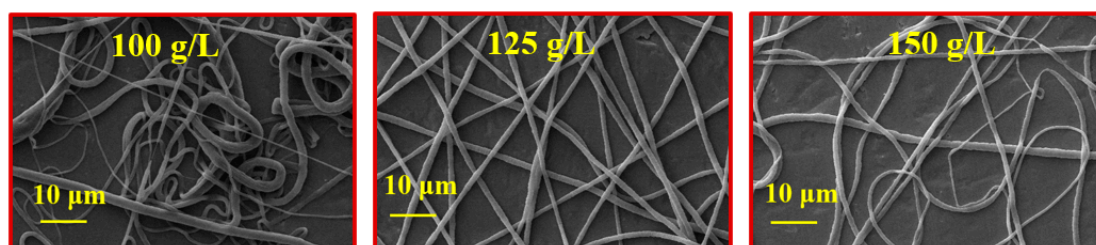

**Figure S2.** SEM images of electrospun fibers at different concentrations of PCL (the electrospinning conditions were: voltage of 13 kV, flow rate of 2.5 mL/h and distance of 13 cm).

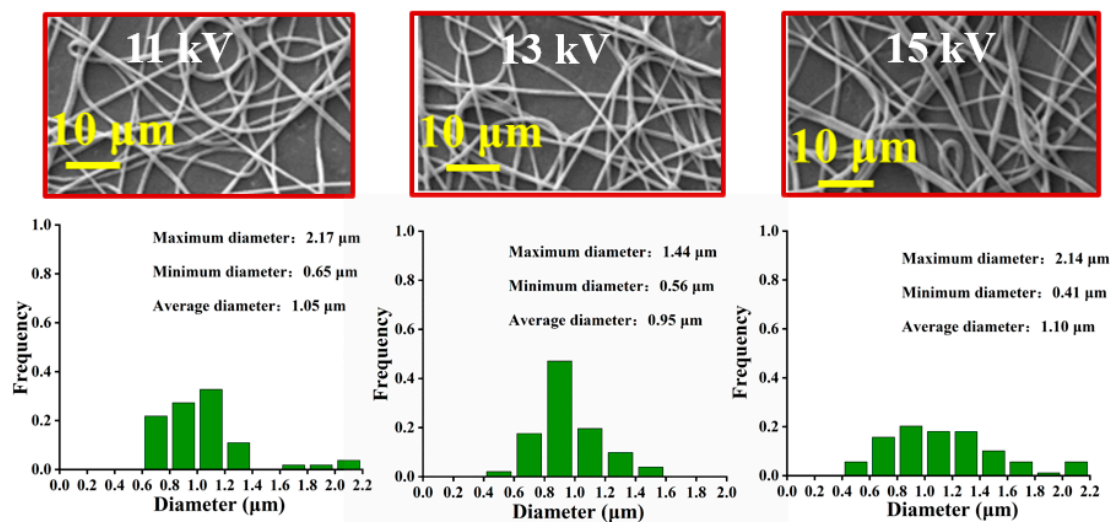

**Figure S3.** SEM images and fiber diameter distributions of PCL fibers under different electrospinning voltages (the electrospinning conditions were: flow rate of 2.5 mL/h and distance of 13cm).

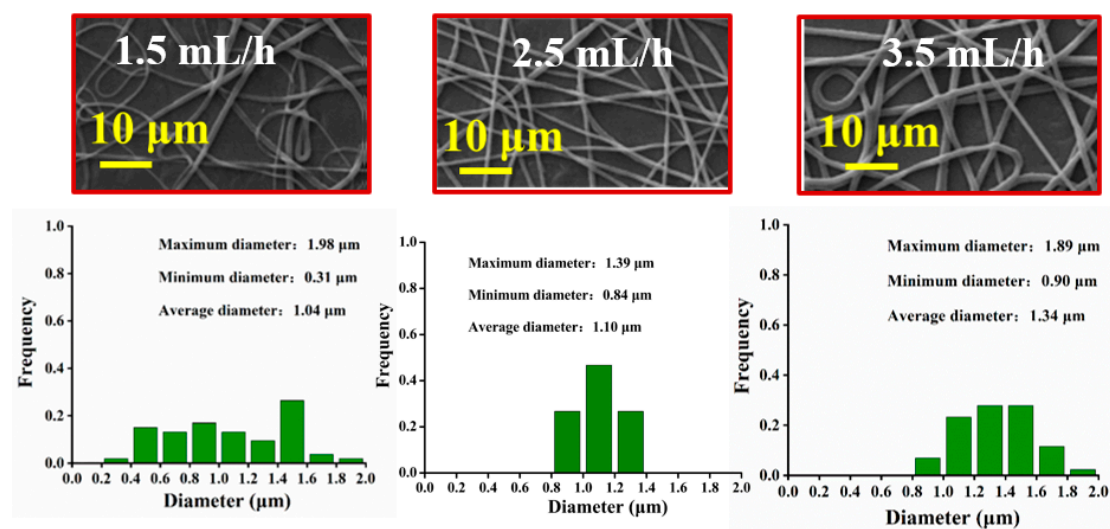

**Figure S4.** SEM images and fiber diameter distributions of electrospun PCL fibers under different flow rates (the electrospinning conditions were: voltage of 13 kV and distance of 13 cm).

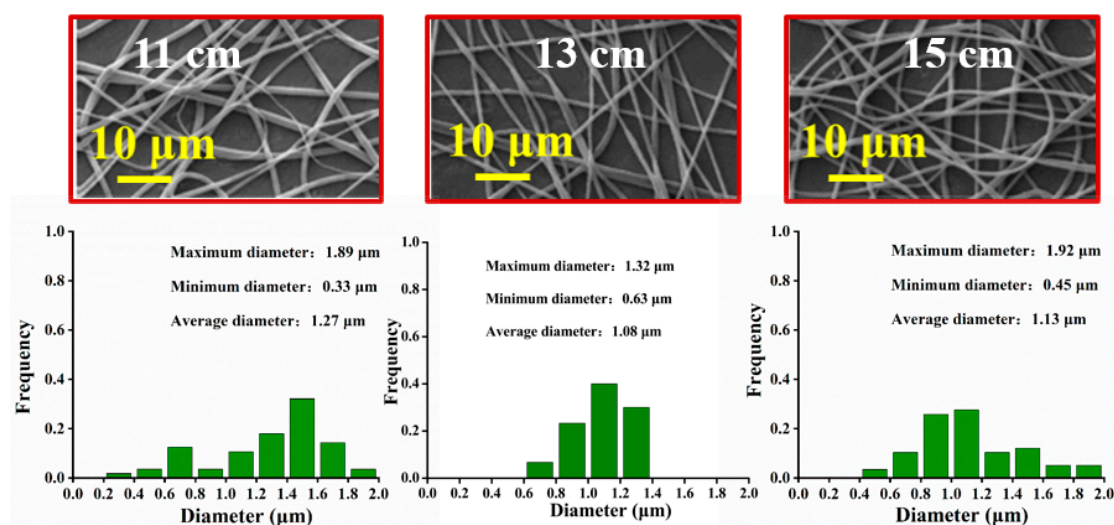

**Figure S5.** SEM images and fiber diameter distributions of electrospun PCL fibers under different distances (the electrospinning conditions were: voltage of 13 kV and flow rate of 2.5 mL/h).
